# Supplementary material
Source: MDPI journal article supplement (https://www.mdpi.com/2072-4292/14/22/5804)
Supplement: s1 [file s1]

# Using a Two-Stage Scheme to Map Toxic Metal Distributions Based on GF-5 Satellite Hyperspectral Images at a Northern Chinese Opencast Coal Mine

Bin Guo <sup>1,\*,†</sup>, Xianan Guo <sup>1,†</sup>, Bo Zhang <sup>2</sup>, Liang Suo <sup>1</sup>, Haorui Bai <sup>1</sup>, Pingping Luo <sup>3</sup>

<sup>1</sup> College of Geomatics, Xi'an University of Science and Technology, Xi'an 710054, China

<sup>2</sup> School of Geosciences and Info-Physics, Central South University, Changsha 410083, China

<sup>3</sup> Key Laboratory of Subsurface Hydrology and Ecological Effects in Arid Region, Ministry of Education, Chang 'an University, Xi'an 710054, China

\* Correspondence: guobin12@xust.edu.cn

† These authors contributed equally to this work.

## supplementary materials

Table S1. Accuracy evaluation of different spectra pretreatment methods

| Element | Method | $R_c^2$ | $RMSE_c$<br>(mg/kg) | $MAE_c$<br>(mg/kg) | $R_v^2$       | $RMSE_v$<br>(mg/kg) | $MAE_v$<br>(mg/kg) |
|---------|--------|---------|---------------------|--------------------|---------------|---------------------|--------------------|
| Zn      | CWT    | 0.6603  | 12.7190             | 9.9406             | 0.2003        | 22.1691             | 17.4324            |
|         | SG+CWT | 0.8380  | 12.4158             | 9.3794             | <b>0.4258</b> | 15.4994             | 12.7899            |
| Ni      | CWT    | 0.8060  | 2.5396              | 1.8127             | 0.2220        | 5.2382              | 3.8892             |
|         | SG+CWT | 0.8984  | 2.3595              | 1.7939             | <b>0.2600</b> | 4.9493              | 3.6779             |

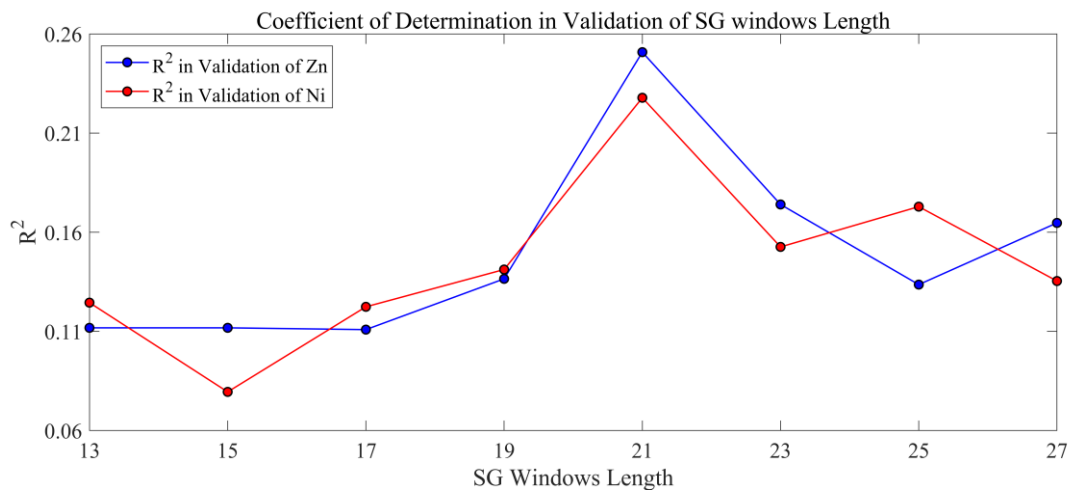

Figure S1. Testing diagram of SG Window Length
